# Supplementary material for: Adaptations Accumulated under Prolonged Resource Exhaustion Are Highly Transient
Source: PubMed Central journal article supplement (PMC7426164; doi:10.1128/msphere.00388-20), 2020-08-12
Supplement: mSphere.00388-20-sf001.pdf [file mSphere.00388-20-sf001.pdf]

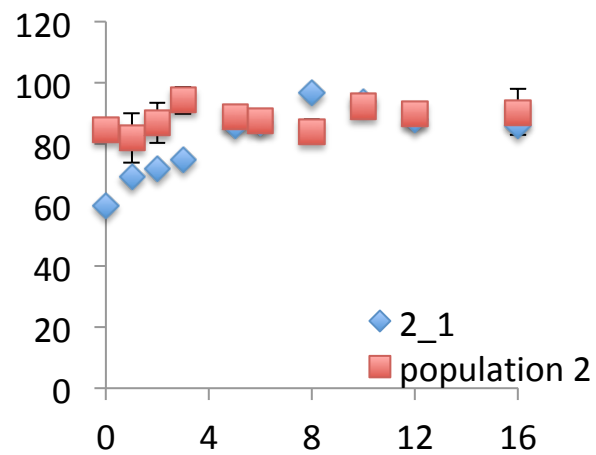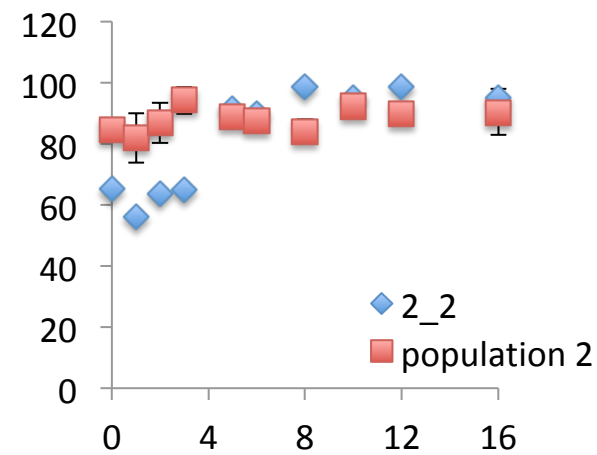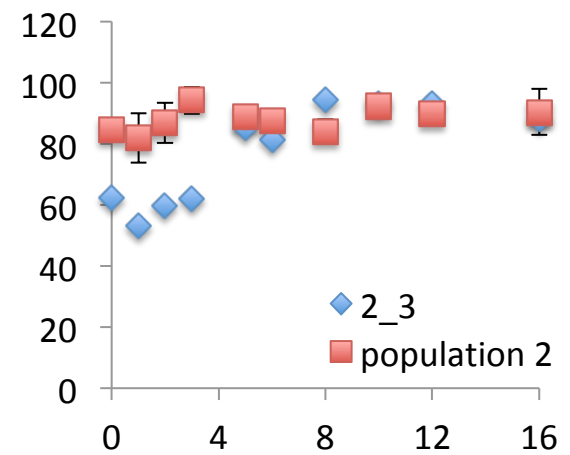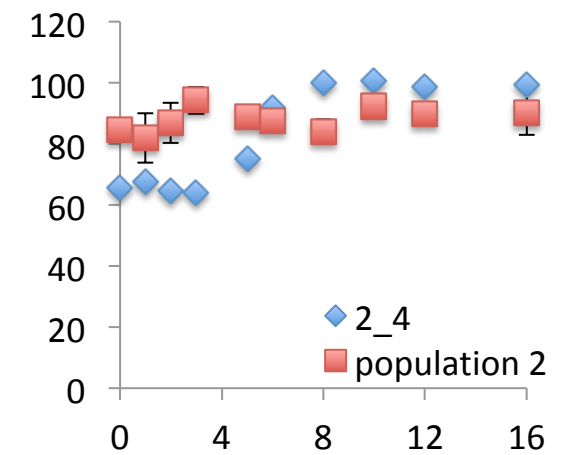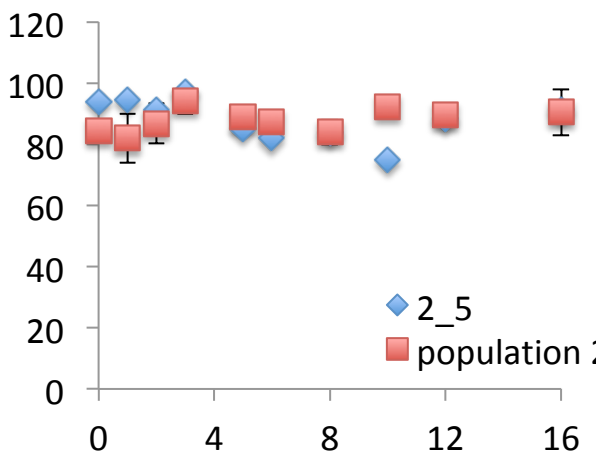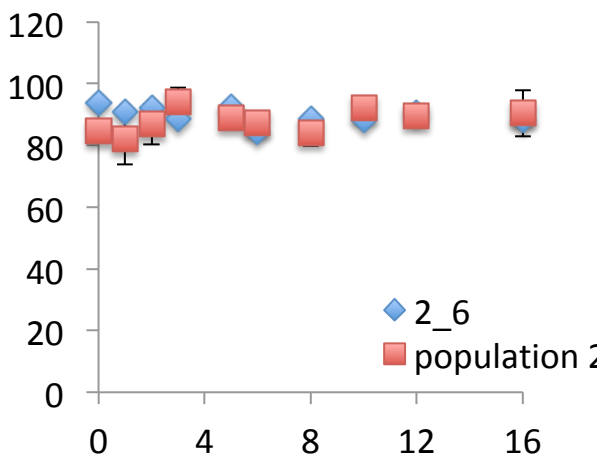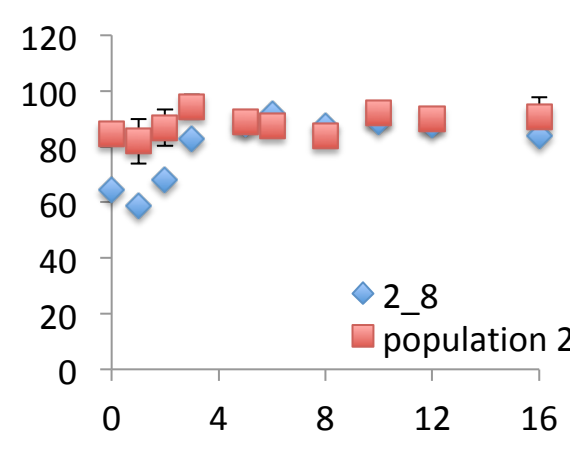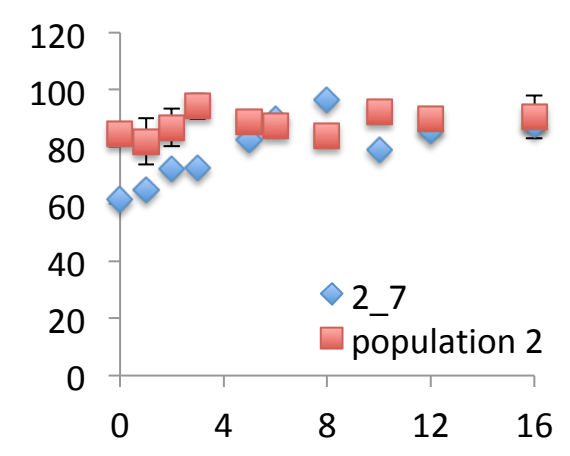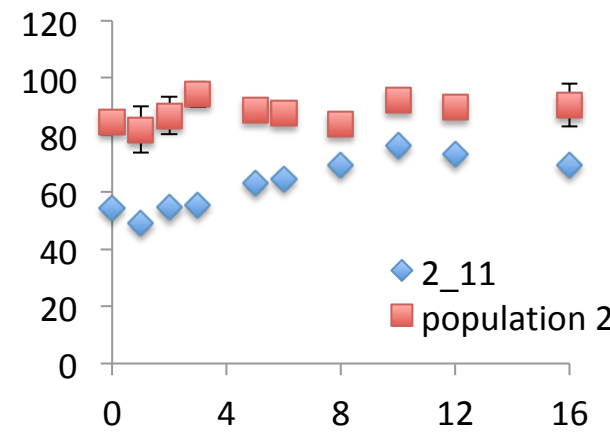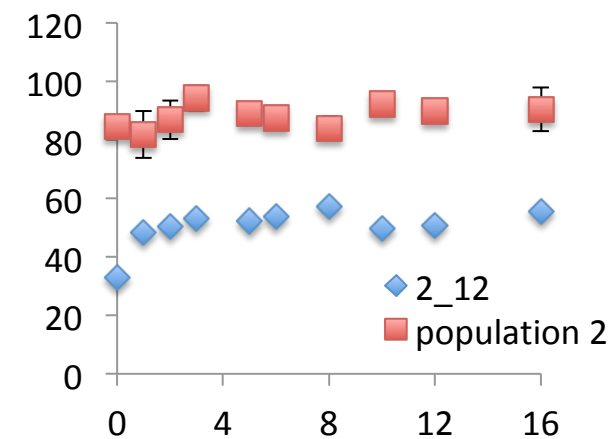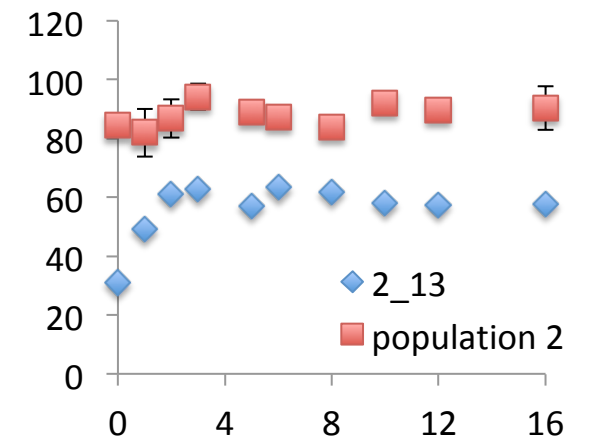

Figure S1
